# Supplementary material for: Intestinal gluconeogenesis is downregulated in pediatric patients with celiac disease
Source: Springer Nature journal article supplement (doi:10.1186/s12916-022-02635-3), 2022-11-11
Supplement: MOESM2 [file 23703214]

**Table S2.** Demographic table summarizing patient characteristics.

| <b>Diagnosis</b>                     | <b>number</b> | <b>percent female</b> | <b>Age (mean <math>\pm</math> SD)</b> |
|--------------------------------------|---------------|-----------------------|---------------------------------------|
| CD                                   | 84            | 70%                   | 6.1 $\pm$ 3.7 ***                     |
| Disease controls                     | 58            | 67%                   | 11.6 $\pm$ 4.5***                     |
| <b><i>Controls per diagnosis</i></b> |               |                       |                                       |
| Food Intolerance                     | 4             | 100%                  | 7.8 $\pm$ 5.5                         |
| Eosinophil Esophagitis               | 1             | 0%                    | 13.1 $\pm$ 0                          |
| Gastritis                            | 11            | 54%                   | 11.2 $\pm$ 3.8                        |
| GERD                                 | 24            | 62%                   | 10.2 $\pm$ 4.2                        |
| RAP                                  | 9             | 78%                   | 12.9 $\pm$ 4                          |
| Family history of CD                 | 2             | 0%                    | 2.6 $\pm$ 1.2                         |
| Family history of UC                 | 1             | 100%                  | 16.5 $\pm$ 1.9                        |
| Hyper-IgD syndrome                   | 1             | 0%                    | 14.8 $\pm$ 0                          |
| IBS                                  | 1             | 0%                    | 4.5 $\pm$ 0                           |
| IgA deficiency                       | 1             | 0%                    | 16.8 $\pm$ 0                          |
| Malabsorption syndrome               | 1             | 0%                    | 9.5 $\pm$ 0                           |
| Obstipation                          | 2             | 100%                  | 11.2 $\pm$ 1.3                        |
| RAP & T1D                            | 1             | 0%                    | 16.8 $\pm$ 0                          |
| GERD & T1D                           | 1             | 100%                  | 18.3 $\pm$ 0                          |

CD = Coeliac Disease, GERD = Gastroesophageal reflux disease, RAP = Recurrent abdominal pain, IBS = Irritable bowel syndrome, UC = Ulcerative Colitis, IGD = Immunoglobulin deficiency, T1D, type 1 diabetes, SD = standard deviation. \*\*\*  $p < 0.001$
